# Supplementary material for: Diagnostic Efficacy and Tolerability of Molded Plastic Nasopharyngeal Swab (FinSwab) Compared to Flocked Nylon Swab in Detection of SARS-CoV-2 and Other Respiratory Viruses
Source: PubMed Central journal article supplement (PMC8528101; doi:10.1128/spectrum.00736-21), 2021-10-20
Supplement: spectrum00736-21_supp_1_seq2.pdf [file spectrum00736-21_supp_1_seq2.pdf]

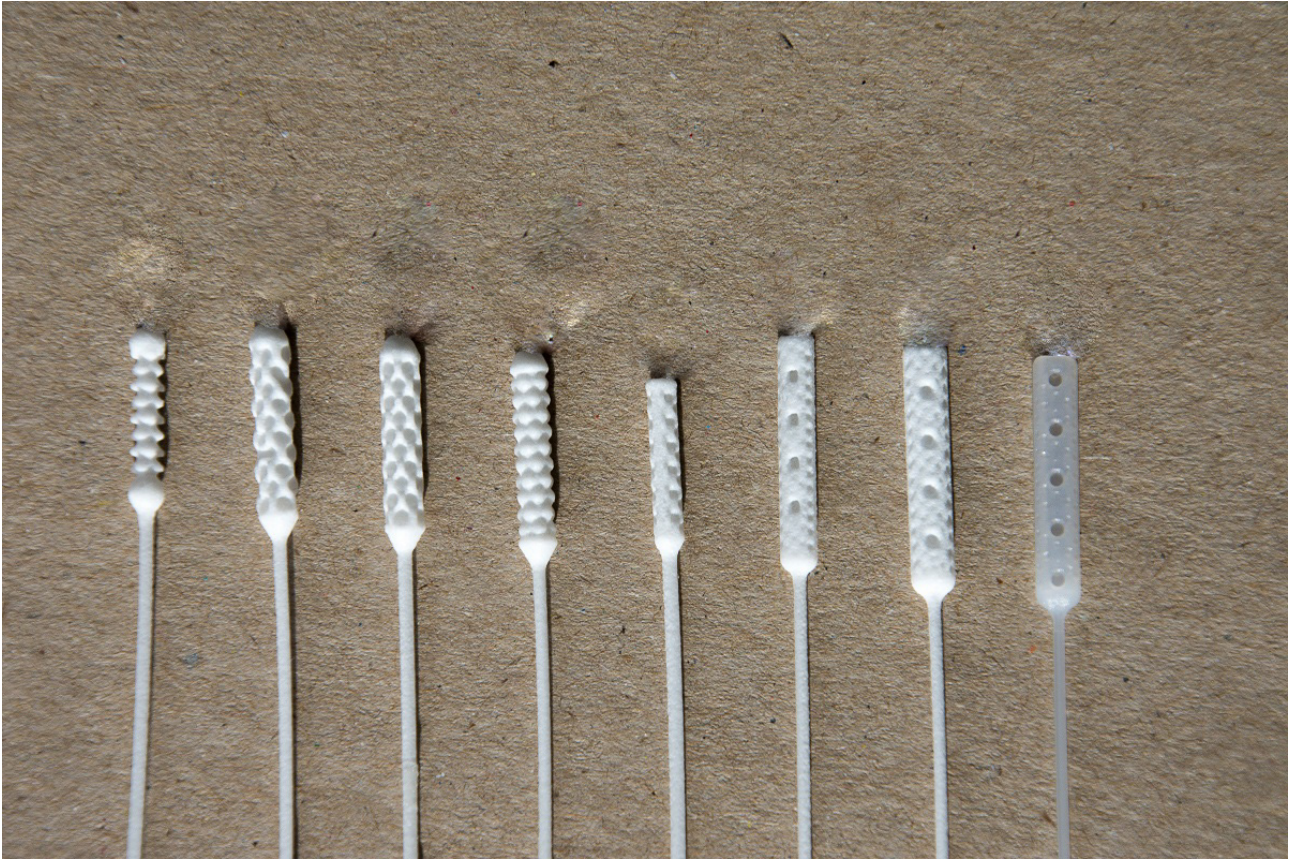

Figure S1. Swab prototypes and the final product (FinSwab; on the right).
